# Supplementary material for: Obesity Drives an Oral Microbiota Signature of Female Patients with Periodontitis: A Pilot Study
Source: MDPI journal article supplement (doi:10.3390/diagnostics11050745), 2021-04-21
Supplement: s1 [file s1]

**Table S1. Comparison between the Relative abundance (%) in oral microbiota of Normo-weighted subjects (NWS 20<BMI<25 (n=9) and Obese subjects (OS) BMI>30 (n=10). Data as mean  $\pm$  SD, \*p<0.05, \*\*p< 0.001, \*\*\*p< 0.0001 unpaired Mann-Whitney test. Significant p-values have been highlighted in bold.**

| Relative abundance (%) in oral microbiota | Microbiota parameters                    | Normo-weighted subjects (NWS) 20<BMI<25 (n=9) | Obese subjects (OS) BMI>30 (n=10) | p-value      |
|-------------------------------------------|------------------------------------------|-----------------------------------------------|-----------------------------------|--------------|
|                                           | $\alpha$ -diversity by the Shannon index | 1.64 $\pm$ 0.80                               | 1.81 $\pm$ 0.78                   | 0.53         |
|                                           | $\alpha$ -diversity by the Chao 1 index  | 30.94 $\pm$ 14.16                             | 32.93 $\pm$ 10.45                 | 0.93         |
| Phylum                                    | Actinobacteria                           | 9.77 $\pm$ 18.70                              | 6.41 $\pm$ 2.83                   | 0.15         |
|                                           | Bacteroidetes                            | 15.42 $\pm$ 16.51                             | 18.25 $\pm$ 12.66                 | 0.83         |
|                                           | Epsilonbacteraeota                       | 1.04 $\pm$ 1.21                               | 0.70 $\pm$ 0.73                   | 0.71         |
|                                           | Firmicutes                               | 23.42 $\pm$ 14.64                             | 29.90 $\pm$ 21.27                 | 0.44         |
|                                           | Fusobacteria                             | 6.50 $\pm$ 6.16                               | 6.28 $\pm$ 5.88                   | 0.90         |
|                                           | Patescibacteria                          | 0.16 $\pm$ 0.34                               | 0.12 $\pm$ 0.17                   | 0.43         |
|                                           | Proteobacteria                           | 43.41 $\pm$ 37.59                             | 38.01 $\pm$ 32.76                 | 0.96         |
|                                           | Spirochaetes                             | 0.07 $\pm$ 0.13                               | 0.22 $\pm$ 0.66                   | 0.32         |
|                                           | Tenericutes                              | 0.20 $\pm$ 0.41                               | 0.09 $\pm$ 0.15                   | 0.89         |
| Class                                     | Actinobacteria                           | 9.41 $\pm$ 18.76                              | 6.08 $\pm$ 3.01                   | 0.27         |
|                                           | Alphaproteobacteria                      | 1.83 $\pm$ 5.49                               | 0.03 $\pm$ 0.08                   | 0.35         |
|                                           | Bacilli                                  | 19.19 $\pm$ 12.64                             | 27.55 $\pm$ 19.85                 | 0.27         |
|                                           | Bacteroidia                              | 15.42 $\pm$ 16.51                             | 18.25 $\pm$ 12.66                 | 0.83         |
|                                           | Campylobacteria                          | 1.04 $\pm$ 1.21                               | 0.70 $\pm$ 0.73                   | 0.71         |
|                                           | Clostridia                               | 3.95 $\pm$ 4.47                               | 2.17 $\pm$ 2.63                   | 0.65         |
|                                           | Coriobacteriia                           | 0.36 $\pm$ 0.81                               | 0.33 $\pm$ 0.40                   | 0.30         |
|                                           | Fusobacteriia                            | 6.50 $\pm$ 6.16                               | 6.28 $\pm$ 5.88                   | 0.90         |
|                                           | Gammaproteobacteria                      | 41.57 $\pm$ 36.08                             | 37.96 $\pm$ 32.75                 | 0.96         |
|                                           | Gracilibacteria                          | 0.15 $\pm$ 0.34                               | 0.11 $\pm$ 0.16                   | 0.42         |
|                                           | Mollicutes                               | 0.20 $\pm$ 0.41                               | 0.09 $\pm$ 0.15                   | 0.89         |
|                                           | Negativicutes                            | 0.28 $\pm$ 0.60                               | 0.19 $\pm$ 0.21                   | 0.71         |
|                                           | Spirochaetia                             | 0.07 $\pm$ 0.13                               | 0.22 $\pm$ 0.66                   | 0.32         |
| Order                                     | Absconditabacteriales (SR1)              | 0.15 $\pm$ 0.34                               | 0.11 $\pm$ 0.16                   | 0.42         |
|                                           | Actinomycetales                          | 1.14 $\pm$ 1.67                               | 2.05 $\pm$ 2.02                   | 0.23         |
|                                           | Bacillales                               | 4.49 $\pm$ 6.89                               | 1.99 $\pm$ 1.96                   | 0.90         |
|                                           | Bacteroidales                            | 15.06 $\pm$ 16.26                             | 15.62 $\pm$ 11.84                 | 0.90         |
|                                           | Betaproteobacteriales                    | 34.48 $\pm$ 35.85                             | 33.26 $\pm$ 33.83                 | 0.84         |
|                                           | Campylobacteriales                       | 1.04 $\pm$ 1.21                               | 0.70 $\pm$ 0.73                   | 0.71         |
|                                           | Caulobacteriales                         | 1.63 $\pm$ 4.89                               | 0.01 $\pm$ 0.02                   | 0.35         |
|                                           | Clostridiales                            | 3.95 $\pm$ 4.47                               | 2.17 $\pm$ 2.63                   | 0.65         |
|                                           | Coriobacteriales                         | 0.36 $\pm$ 0.81                               | 0.33 $\pm$ 0.40                   | 0.30         |
|                                           | Corynebacteriales                        | 0.05 $\pm$ 0.07                               | 0.30 $\pm$ 0.43                   | 0.17         |
|                                           | Flavobacteriales                         | 0.30 $\pm$ 0.31                               | 2.62 $\pm$ 3.20                   | <b>*0.03</b> |
|                                           | Fusobacteriales                          | 6.50 $\pm$ 6.16                               | 6.28 $\pm$ 5.88                   | 0.90         |

|        |                       |               |               |       |
|--------|-----------------------|---------------|---------------|-------|
|        | Lactobacillales       | 14.70 ± 10.16 | 25.56 ± 18.42 | 0.18  |
|        | Micrococcales         | 8.21 ± 18.56  | 3.72 ± 2.31   | 0.35  |
|        | Mycoplasmatales       | 0.16 ± 0.29   | 0.09 ± 0.15   | 0.89  |
|        | Pasteurellales        | 2.53 ± 2.65   | 4.59 ± 4.43   | 0.27  |
|        | Pseudomonadales       | 4.55 ± 13.59  | 0.04 ± 0.08   | 0.49  |
|        | Rhizobiales           | 0.20 ± 0.59   | 0 ± 0         | 0.34  |
|        | Selenomonadales       | 0.28 ± 0.60   | 0.19 ± 0.21   | 0.71  |
|        | Spirochaetales        | 0.07 ± 0.13   | 0.22 ± 0.66   | 0.32  |
| Family | Actinomycetaceae      | 1.14 ± 1.67   | 2.05 ± 2.02   | 0.23  |
|        | Aerococcaceae         | 0.02 ± 0.04   | 0.61 ± 1.35   | 0.05  |
|        | Atopobiaceae          | 0.36 ± 0.81   | 0.31 ± 0.38   | 0.30  |
|        | Bacteroidaceae        | 0.15 ± 0.43   | 0 ± 0         | 0.34  |
|        | Burkholderiaceae      | 0.10 ± 0.16   | 0.85 ± 1.94   | 0.08  |
|        | Campylobacteraceae    | 1.03 ± 1.21   | 0.70 ± 0.73   | 0.71  |
|        | Caulobacteraceae      | 1.63 ± 4.89   | 0.01 ± 0.02   | 0.35  |
|        | Corynebacteriaceae    | 0.05 ± 0.07   | 0.29 ± 0.42   | 0.17  |
|        | Family XI             | 1.36 ± 1.30   | 2.18 ± 2.09   | 0.30  |
|        | Family XIII           | 0.67 ± 1.06   | 0.21 ± 0.35   | 0.77  |
|        | Flavobacteriaceae     | 0.27 ± 0.29   | 2.47 ± 3.02   | *0.04 |
|        | Fusobacteriaceae      | 4.67 ± 3.78   | 3.60 ± 3.94   | 0.77  |
|        | Lachnospiraceae       | 1.32 ± 1.53   | 0.99 ± 1.25   | 0.90  |
|        | Lactobacillaceae      | 0.37 ± 1.07   | 0.02 ± 0.05   | 0.64  |
|        | Leptotrichiaceae      | 1.83 ± 3.42   | 2.68 ± 2.71   | 0.23  |
|        | Micrococcaceae        | 8.15 ± 18.40  | 3.72 ± 2.31   | 0.35  |
|        | Moraxellaceae         | 4.53 ± 13.59  | 0.03 ± 0.08   | 0.86  |
|        | Multi-affiliation     | 1.17 ± 0.98   | 2.59 ± 1.79   | *0.04 |
|        | Mycoplasmataceae      | 0.16 ± 0.29   | 0.09 ± 0.15   | 0.89  |
|        | Neisseriaceae         | 34.39 ± 35.87 | 32.41 ± 34.11 | 0.96  |
|        | Pasteurellaceae       | 2.53 ± 2.65   | 4.59 ± 4.43   | 0.27  |
|        | Peptostreptococcaceae | 0.96 ± 1.47   | 0.59 ± 0.92   | 0.77  |
|        | Porphyromonadaceae    | 3.99 ± 6.58   | 6.04 ± 5.85   | 0.38  |
|        | Prevotellaceae        | 10.13 ± 12.29 | 8.94 ± 9.19   | 0.96  |
|        | Rhizobiaceae          | 0.20 ± 0.59   | 0 ± 0         | 0.34  |
|        | Rikenellaceae         | 0.23 ± 0.58   | 0.04 ± 0.08   | 0.96  |
|        | Ruminococcaceae       | 0.66 ± 0.97   | 0.16 ± 0.20   | 0.30  |
|        | Spirochaetaceae       | 0.07 ± 0.13   | 0.22 ± 0.66   | 0.32  |
|        | Staphylococcaceae     | 3.35 ± 7.28   | 0.009 ± 0.02  | 0.57  |
|        | Streptococcaceae      | 13.14 ± 9.83  | 22.34 ± 17.13 | 0.24  |
|        | Tannerellaceae        | 0.22 ± 0.26   | 0.50 ± 1.05   | 0.96  |
|        | Unknown               | 0.24 ± 0.34   | 0.16 ± 0.16   | 0.83  |
|        | Veillonellaceae       | 0.28 ± 0.60   | 0.19 ± 0.21   | 0.71  |
| Genus  | <i>Abiotrophia</i>    | 0.02 ± 0.04   | 0.61 ± 1.35   | 0.05  |
|        | <i>Acinetobacter</i>  | 4.53 ± 13.59  | 0 ± 0         | 0.14  |
|        | <i>Actinobacillus</i> | 0.04 ± 0.13   | 0.37 ± 0.69   | 0.18  |
|        | <i>Actinomyces</i>    | 1.14 ± 1.67   | 2.05 ± 2.02   | 0.23  |

|  |                                                           |               |               |              |
|--|-----------------------------------------------------------|---------------|---------------|--------------|
|  | <i>Aggregatibacter</i>                                    | 0.14 ± 0.25   | 0.78 ± 1.56   | 0.23         |
|  | <i>Alloprevotella</i>                                     | 1.49 ± 2.43   | 0.66 ± 0.82   | 0.77         |
|  | <i>Allorhizobium-Neorhizobium-Pararhizobium-Rhizobium</i> | 0.20 ± 0.59   | 0 ± 0         | 0.34         |
|  | <i>Atopobium</i>                                          | 0.36 ± 0.82   | 0.31 ± 0.38   | 0.30         |
|  | <i>Bacteroides</i>                                        | 0.15 ± 0.44   | 0 ± 0         | 0.34         |
|  | <i>Bergeyella</i>                                         | 0.03 ± 0.03   | 0.15 ± 0.24   | 0.18         |
|  | <i>Brevundimonas</i>                                      | 1.63 ± 4.89   | 0 ± 0         | 0.34         |
|  | <i>Campylobacter</i>                                      | 1.04 ± 1.21   | 0.70 ± 0.73   | 0.71         |
|  | <i>Capnocytophaga</i>                                     | 0.27 ± 0.29   | 2.47 ± 3.02   | <b>*0.04</b> |
|  | <i>Catonella</i>                                          | 0.22 ± 0.26   | 0.09 ± 0.10   | 0.56         |
|  | <i>Corynebacterium</i>                                    | 0.05 ± 0.07   | 0.29 ± 0.43   | 0.17         |
|  | <i>Dialister</i>                                          | 0.28 ± 0.59   | 0.18 ± 0.20   | 0.80         |
|  | <i>F0058</i>                                              | 0.11 ± 0.16   | 0.06 ± 0.09   | 0.70         |
|  | <i>Filifactor</i>                                         | 0.82 ± 1.40   | 0.51 ± 0.94   | 0.90         |
|  | <i>Fusobacterium</i>                                      | 4.67 ± 3.79   | 3.60 ± 3.94   | 0.77         |
|  | <i>Gemella</i>                                            | 1.14 ± 1.20   | 1.98 ± 1.97   | 0.20         |
|  | <i>Haemophilus</i>                                        | 2.35 ± 2.43   | 3.45 ± 3.02   | 0.34         |
|  | <i>Kingella</i>                                           | 0.06 ± 0.09   | 0.43 ± 0.99   | 0.24         |
|  | <i>Lachnoanaerobaculum</i>                                | 0.27 ± 0.50   | 0.17 ± 0.17   | 0.86         |
|  | <i>Lactobacillus</i>                                      | 0.37 ± 1.07   | 0.02 ± 0.05   | 0.64         |
|  | <i>Lautropia</i>                                          | 0.08 ± 0.14   | 0.78 ± 1.85   | 0.21         |
|  | <i>Leptotrichia</i>                                       | 1.77 ± 3.44   | 2.66 ± 2.72   | 0.26         |
|  | <i>Multi-affiliation</i>                                  | 1.17 ± 0.98   | 2.59 ± 1.79   | <b>*0.04</b> |
|  | <i>Mycoplasma</i>                                         | 0.16 ± 0.29   | 0.09 ± 0.15   | 0.89         |
|  | <i>Neisseria</i>                                          | 34.31 ± 35.90 | 31.90 ± 34.47 | 0.96         |
|  | <i>Oribacterium</i>                                       | 0.28 ± 0.38   | 0.31 ± 0.30   | 0.74         |
|  | <i>Parvimonas</i>                                         | 0.22 ± 0.26   | 0.20 ± 0.30   | 0.90         |
|  | <i>Peptostreptococcus</i>                                 | 0.12 ± 0.13   | 0.02 ± 0.02   | 0.10         |
|  | <i>Porphyromonas</i>                                      | 4.00 ± 6.58   | 6.04 ± 5.85   | 0.38         |
|  | <i>Prevotella</i>                                         | 1.61 ± 2.02   | 1.46 ± 1.35   | 0.83         |
|  | <i>Prevotella 2</i>                                       | 0.08 ± 0.12   | 0.15 ± 0.17   | 0.30         |
|  | <i>Prevotella 6</i>                                       | 0.47 ± 0.81   | 0.42 ± 0.53   | 0.96         |
|  | <i>"Prevotella 7"</i>                                     | 6.23 ± 8.71   | 6.25 ± 7.20   | 0.96         |
|  | <i>Rikenellaceae RC9 gut group</i>                        | 0.23 ± 0.58   | 0.04 ± 0.08   | 0.96         |
|  | <i>Rothia</i>                                             | 8.15 ± 18.40  | 3.69 ± 2.32   | 0.35         |
|  | <i>Ruminococcaceae UCG-014</i>                            | 0.66 ± 0.97   | 0.16 ± 0.20   | 0.30         |
|  | <i>Staphylococcus</i>                                     | 3.35 ± 7.28   | 0.009 ± 0.02  | 0.57         |
|  | <i>Stomatobaculum</i>                                     | 0.43 ± 0.58   | 0.33 ± 0.70   | 0.93         |
|  | <i>Streptococcus</i>                                      | 13.09 ± 9.81  | 22.34 ± 17.13 | 0.24         |
|  | <i>Tannerella</i>                                         | 0.22 ± 0.26   | 0.50 ± 1.05   | 0.96         |
|  | <i>Treponema 2</i>                                        | 0.07 ± 0.13   | 0.22 ± 0.66   | 0.32         |
|  | <i>Unknown</i>                                            | 0.63 ± 0.72   | 0.25 ± 0.20   | 0.66         |
|  | <i>[Eubacterium] brachy group</i>                         | 0.14 ± 0.30   | 0.05 ± 0.09   | 0.74         |
|  | <i>[Eubacterium] nodatum group</i>                        | 0.28 ± 0.53   | 0.08 ± 0.13   | 0.64         |

**Table S2: Comparison between the Relative abundance (%) in oral microbiota of Obese males (OM) BMI>30 (n=5) and Obese females (OF) BMI>30 (n=5). Data as mean  $\pm$  SD, \*p<0.05, \*\*p< 0.001, \*\*\*p< 0.0001 unpaired Mann-Whitney test. Significant p-values have been highlighted in bold.**

| Relative abundance (%)<br>in oral microbiota | Microbiota parameters                    | Obese males (OM)<br>BMI>30 (n=5) | Obese females (OF)<br>BMI>30 (n=5) | p-value        |
|----------------------------------------------|------------------------------------------|----------------------------------|------------------------------------|----------------|
|                                              | $\alpha$ -diversity by the Shannon index | 1.36 $\pm$ 0.89                  | 1.26 $\pm$ 0.27                    | 0.09           |
|                                              | $\alpha$ -diversity by the Chao 1 index  | 26.41 $\pm$ 11.21                | 39.45 $\pm$ 3.74                   | <b>*0.03</b>   |
| Phylum                                       | Actinobacteria                           | 5.59 $\pm$ 2.71                  | 7.23 $\pm$ 2.99                    | 0.31           |
|                                              | Bacteroidetes                            | 12.35 $\pm$ 12.71                | 24.16 $\pm$ 10.57                  | 0.09           |
|                                              | Epsilonbacteraeota                       | 0.32 $\pm$ 0.47                  | 1.08 $\pm$ 0.80                    | 0.09           |
|                                              | Firmicutes                               | 13.82 $\pm$ 11.71                | 45.98 $\pm$ 15.32                  | <b>**0.007</b> |
|                                              | Fusobacteria                             | 4.42 $\pm$ 6.43                  | 8.14 $\pm$ 5.27                    | 0.29           |
|                                              | Patescibacteria                          | 0.18 $\pm$ 0.23                  | 0.07 $\pm$ 0.05                    | 0.99           |
|                                              | Proteobacteria                           | 63.31 $\pm$ 25.87                | 12.72 $\pm$ 12.05                  | <b>**0.007</b> |
|                                              | Spirochaetes                             | 0 $\pm$ 0                        | 0.45 $\pm$ 0.93                    | <b>*0.02</b>   |
|                                              | Tenericutes                              | 0.01 $\pm$ 0.02                  | 0.18 $\pm$ 0.19                    | 0.07           |
| Class                                        | Actinobacteria                           | 5.44 $\pm$ 2.73                  | 6.72 $\pm$ 3.46                    | 0.42           |
|                                              | Bacilli                                  | 12.99 $\pm$ 11.35                | 42.11 $\pm$ 15.10                  | <b>*0.03</b>   |
|                                              | Bacteroidia                              | 12.35 $\pm$ 12.71                | 24.16 $\pm$ 10.57                  | 0.09           |
|                                              | Campylobacteria                          | 0.32 $\pm$ 0.47                  | 1.08 $\pm$ 0.80                    | 0.09           |
|                                              | Clostridia                               | 0.82 $\pm$ 0.95                  | 3.52 $\pm$ 3.18                    | 0.09           |
|                                              | Coriobacteriia                           | 0.15 $\pm$ 0.20                  | 0.51 $\pm$ 0.48                    | 0.29           |
|                                              | Fusobacteriia                            | 4.42 $\pm$ 6.43                  | 8.14 $\pm$ 5.27                    | 0.29           |
|                                              | Gammaproteobacteria                      | 63.28 $\pm$ 25.82                | 12.66 $\pm$ 12.09                  | <b>**0.008</b> |
|                                              | Gracilibacteria                          | 0.17 $\pm$ 0.22                  | 0.06 $\pm$ 0.05                    | 0.83           |
|                                              | Mollicutes                               | 0.01 $\pm$ 0.02                  | 0.18 $\pm$ 0.19                    | 0.06           |
|                                              | Negativicutes                            | 0.02 $\pm$ 0.02                  | 0.36 $\pm$ 0.16                    | <b>*0.01</b>   |
|                                              | Spirochaetia                             | 0 $\pm$ 0                        | 0.45 $\pm$ 0.93                    | <b>*0.02</b>   |
| Order                                        | Absconditabacteriales (SR1)              | 0.17 $\pm$ 0.22                  | 0.06 $\pm$ 0.05                    | 0.83           |
|                                              | Actinomycetales                          | 0.73 $\pm$ 0.62                  | 3.38 $\pm$ 2.10                    | <b>*0.05</b>   |
|                                              | Bacillales                               | 0.92 $\pm$ 0.89                  | 3.05 $\pm$ 2.24                    | 0.15           |
|                                              | Bacteroidales                            | 11.17 $\pm$ 11.31                | 20.07 $\pm$ 11.74                  | 0.14           |
|                                              | Betaproteobacteriales                    | 58.54 $\pm$ 30.30                | 7.99 $\pm$ 7.75                    | <b>**0.008</b> |
|                                              | Campylobacteriales                       | 0.32 $\pm$ 0.47                  | 1.08 $\pm$ 0.80                    | 0.09           |
|                                              | Cardiobacteriales                        | 0.005 $\pm$ 0.007                | 0.11 $\pm$ 0.14                    | <b>*0.01</b>   |
|                                              | Clostridiales                            | 0.82 $\pm$ 0.95                  | 3.52 $\pm$ 3.18                    | 0.09           |
|                                              | Coriobacteriales                         | 0.15 $\pm$ 0.20                  | 0.51 $\pm$ 0.48                    | 0.20           |
|                                              | Corynebacteriales                        | 0.02 $\pm$ 0.03                  | 0.58 $\pm$ 0.46                    | <b>*0.01</b>   |
|                                              | Flavobacteriales                         | 1.18 $\pm$ 1.57                  | 4.07 $\pm$ 3.92                    | 0.20           |
|                                              | Fusobacteriales                          | 4.42 $\pm$ 6.43                  | 8.14 $\pm$ 5.27                    | 0.29           |
|                                              | Lactobacillales                          | 12.07 $\pm$ 10.48                | 39.05 $\pm$ 14.09                  | <b>*0.01</b>   |

|               |                        |               |               |                |
|---------------|------------------------|---------------|---------------|----------------|
|               | Micrococcales          | 4.69 ± 2.57   | 2.74 ± 1.74   | 0.31           |
|               | Mycoplasmatales        | 0.01 ± 0.02   | 0.18 ± 0.19   | 0.06           |
|               | Pasteurellales         | 4.64 ± 5.08   | 4.55 ± 4.29   | 0.99           |
|               | Selenomonadales        | 0.02 ± 0.02   | 0.36 ± 0.16   | <b>*0.01</b>   |
|               | Spirochaetales         | 0 ± 0         | 0.45 ± 0.93   | <b>*0.02</b>   |
| <b>Family</b> | Actinomycetaceae       | 0.73 ± 0.62   | 3.38 ± 2.10   | <b>*0.05</b>   |
|               | Aerococcaceae          | 0.06 ± 0.06   | 1.15 ± 1.83   | 0.75           |
|               | Atopobiaceae           | 0.15 ± 0.20   | 0.47 ± 0.46   | 0.29           |
|               | Burkholderiaceae       | 0.34 ± 0.44   | 1.35 ± 2.77   | 0.99           |
|               | Campylobacteraceae     | 0.32 ± 0.47   | 1.08 ± 0.80   | 0.09           |
|               | Cardiobacteriaceae     | 0.01 ± 0.01   | 0.11 ± 0.14   | <b>*0.01</b>   |
|               | Corynebacteriaceae     | 0.02 ± 0.03   | 0.57 ± 0.47   | <b>*0.01</b>   |
|               | Family XI              | 0.91 ± 0.91   | 3.44 ± 2.24   | <b>*0.03</b>   |
|               | Family XIII            | 0.02 ± 0.03   | 0.39 ± 0.43   | <b>*0.01</b>   |
|               | Flavobacteriaceae      | 1.08 ± 1.50   | 3.86 ± 3.66   | 0.21           |
|               | Fusobacteriaceae       | 2.30 ± 3.95   | 4.89 ± 3.89   | 0.21           |
|               | Lachnospiraceae        | 0.53 ± 0.61   | 1.45 ± 1.62   | 0.29           |
|               | Leptotrichiaceae       | 2.12 ± 2.74   | 3.25 ± 2.85   | 0.40           |
|               | Micrococcaceae         | 4.69 ± 2.57   | 2.74 ± 1.74   | 0.31           |
|               | Multi-affiliation      | 1.44 ± 1.00   | 3.74 ± 1.70   | <b>*0.03</b>   |
|               | Mycoplasmataceae       | 0.01 ± 0.02   | 0.18 ± 0.19   | 0.06           |
|               | Neisseriaceae          | 58.20 ± 30.47 | 6.63 ± 5.27   | <b>**0.008</b> |
|               | Paludibacteraceae      | 0.007 ± 0.02  | 0.11 ± 0.11   | <b>*0.01</b>   |
|               | Pasteurellaceae        | 464 ± 5.08    | 4.55 ± 4.29   | 0.99           |
|               | Peptostreptococcaceae  | 0.15 ± 0.24   | 1.02 ± 1.17   | 0.09           |
|               | Porphyromonadaceae     | 6.16 ± 7.61   | 5.91 ± 4.35   | 0.83           |
|               | Prevotellaceae         | 4.95 ± 7.28   | 12.93 ± 9.87  | 0.14           |
|               | Rikenellaceae          | 0.001 ± 0.001 | 0.08 ± 0.11   | <b>**0.009</b> |
|               | Ruminococcaceae        | 0.09 ± 0.19   | 0.22 ± 0.21   | 0.50           |
|               | Spirochaetaceae        | 0 ± 0         | 0.45 ± 0.93   | <b>*0.02</b>   |
|               | Streptococcaceae       | 10.55 ± 10.42 | 34.12 ± 14.29 | <b>*0.05</b>   |
|               | Tannerellaceae         | 0.04 ± 0.09   | 0.96 ± 1.40   | 0.06           |
|               | Unknown                | 0.19 ± 0.21   | 0.14 ± 0.12   | 0.99           |
|               | Veillonellaceae        | 0.02 ± 0.02   | 0.36 ± 0.16   | <b>*0.01</b>   |
|               | Weeksellaceae          | 0.10 ± 0.09   | 0.21 ± 0.34   | 0.99           |
| <b>Genus</b>  | <i>Abiotrophia</i>     | 0.06 ± 0.06   | 1.15 ± 1.83   | 0.75           |
|               | <i>Actinobacillus</i>  | 0.72 ± 0.97   | 0.01 ± 0.02   | 0.15           |
|               | <i>Actinomyces</i>     | 0.73 ± 0.62   | 3.38 ± 2.10   | <b>*0.05</b>   |
|               | <i>Aggregatibacter</i> | 0.27 ± 0.54   | 1.29 ± 2.13   | 0.29           |
|               | <i>Alloprevotella</i>  | 0.84 ± 1.13   | 0.48 ± 0.41   | 0.67           |
|               | <i>Atopobium</i>       | 0.15 ± 0.20   | 0.47 ± 0.46   | 0.29           |
|               | <i>Bergeyella</i>      | 0.10 ± 0.09   | 0.21 ± 0.34   | 0.99           |
|               | <i>Campylobacter</i>   | 0.33 ± 0.47   | 1.08 ± 0.80   | 0.09           |
|               | <i>Capnocytophaga</i>  | 1.08 ± 1.50   | 3.86 ± 3.66   | 0.20           |
|               | <i>Cardiobacterium</i> | 0.005 ± 0.007 | 0.11 ± 0.14   | <b>*0.01</b>   |

|  |                                    |               |               |                |
|--|------------------------------------|---------------|---------------|----------------|
|  | <i>Catonella</i>                   | 0.05 ± 0.09   | 0.13 ± 0.10   | 0.29           |
|  | <i>Corynebacterium</i>             | 0.02 ± 0.03   | 0.57 ± 0.47   | <b>*0.01</b>   |
|  | <i>Dialister</i>                   | 0.02 ± 0.02   | 0.33 ± 0.15   | <b>*0.01</b>   |
|  | <i>Eikenella</i>                   | 0.07 ± 0.09   | 0.11 ± 0.13   | 0.52           |
|  | <i>F0058</i>                       | 0.007 ± 0.01  | 0.11 ± 0.11   | <b>*0.01</b>   |
|  | <i>Filifactor</i>                  | 0.03 ± 0.03   | 0.99 ± 1.18   | <b>*0.01</b>   |
|  | <i>Fusobacterium</i>               | 2.30 ± 3.95   | 4.89 ± 3.89   | 0.20           |
|  | <i>Gemella</i>                     | 0.91 ± 0.91   | 3.05 ± 2.24   | 0.15           |
|  | <i>Haemophilus</i>                 | 3.64 ± 3.89   | 3.25 ± 2.31   | 0.99           |
|  | <i>Kingella</i>                    | 0.08 ± 0.10   | 0.77 ± 1.37   | 0.20           |
|  | <i>Lachnoanaerobaculum</i>         | 0.16 ± 0.21   | 0.18 ± 0.14   | 0.83           |
|  | <i>Lautropia</i>                   | 0.28 ± 0.47   | 1.27 ± 2.62   | 0.83           |
|  | <i>Leptotrichia</i>                | 2.08 ± 2.77   | 3.25 ± 2.85   | 0.40           |
|  | <i>Moryella</i>                    | 0 ± 0         | 0.14 ± 0.24   | <b>*0.02</b>   |
|  | <i>Multi-affiliation</i>           | 1.44 ± 1.00   | 3.74 ± 1.70   | <b>*0.03</b>   |
|  | <i>Mycoplasma</i>                  | 0.01 ± 0.02   | 0.18 ± 0.19   | 0.06           |
|  | <i>Neisseria</i>                   | 58.05 ± 30.64 | 5.75 ± 5.03   | <b>**0.008</b> |
|  | <i>Oribacterium</i>                | 0.22 ± 0.25   | 0.41 ± 0.34   | 0.67           |
|  | <i>Parvimonas</i>                  | 0.006 ± 0.005 | 0.40 ± 0.33   | <b>*0.01</b>   |
|  | <i>Porphyromonas</i>               | 6.16 ± 7.61   | 5.91 ± 4.35   | 0.83           |
|  | <i>Prevotella</i>                  | 0.86 ± 1.10   | 2.07 ± 1.40   | 0.14           |
|  | <i>Prevotella 2</i>                | 0.10 ± 0.19   | 0.19 ± 0.16   | 0.29           |
|  | <i>Prevotella 6</i>                | 0.13 ± 0.28   | 0.70 ± 0.59   | 0.10           |
|  | <i>Prevotella 7</i>                | 3.02 ± 5.70   | 9.47 ± 7.62   | 0.14           |
|  | <i>Rikenellaceae RC9 gut group</i> | 0.001 ± 0.002 | 0.08 ± 0.11   | <b>*0.009</b>  |
|  | <i>Rothia</i>                      | 4.65 ± 2.61   | 2.74 ± 1.74   | 0.31           |
|  | <i>Ruminococcaceae UCG-014</i>     | 0.09 ± 0.19   | 0.22 ± 0.21   | 0.50           |
|  | <i>Stomatobaculum</i>              | 0.09 ± 0.11   | 0.56 ± 0.98   | 0.39           |
|  | <i>Streptococcus</i>               | 10.55 ± 10.42 | 34.12 ± 14.29 | <b>*0.05</b>   |
|  | <i>Tannerella</i>                  | 0.04 ± 0.09   | 0.96 ± 1.40   | 0.06           |
|  | <i>Treponema 2</i>                 | 0 ± 0         | 0.45 ± 0.93   | <b>*0.02</b>   |
|  | <i>Unknown</i>                     | 0.24 ± 0.21   | 0.26 ± 0.22   | 0.99           |
|  | <i>Veillonella</i>                 | 0.001 ± 0.002 | 0.02 ± 0.02   | <b>**0.009</b> |

**Table S3: Comparison between the Relative abundance (%) in oral microbiota of Normo-weighted females (NWF) 20<BMI<25 (n=4) and Obese females (OF) BMI>30 (n=5). Data as mean  $\pm$  SD, \*p<0.05, \*\*p< 0.001, \*\*\*p< 0.0001 unpaired Mann-Whitney test. Significant p-values have been highlighted in bold.**

| Relative abundance (%)<br>in oral microbiota | Microbiota parameters                    | Normo-weighted females (NWF)<br>20<BMI<25 (n=4) | Obese females (OF)<br>BMI>30 (n=5) | p-value      |
|----------------------------------------------|------------------------------------------|-------------------------------------------------|------------------------------------|--------------|
|                                              | $\alpha$ -diversity by the Shannon index | 1.47 $\pm$ 0.96                                 | 2.26 $\pm$ 0.27                    | 0.11         |
|                                              | $\alpha$ -diversity by the Chao 1 index  | 31.69 $\pm$ 15.28                               | 39.45 $\pm$ 3.74                   | 0.55         |
| Phylum                                       | Actinobacteria                           | 2.06 $\pm$ 2.03                                 | 7.23 $\pm$ 2.99                    | <b>*0.03</b> |
|                                              | Bacteroidetes                            | 11.75 $\pm$ 16.89                               | 24.16 $\pm$ 10.57                  | 0.19         |
|                                              | Epsilonbacteraeota                       | 0.54 $\pm$ 0.42                                 | 1.08 $\pm$ 0.80                    | 0.55         |
|                                              | Firmicutes                               | 21.67 $\pm$ 20.34                               | 45.98 $\pm$ 15.32                  | 0.11         |
|                                              | Fusobacteria                             | 4.57 $\pm$ 3.17                                 | 8.14 $\pm$ 5.27                    | 0.55         |
|                                              | Proteobacteria                           | 58.83 $\pm$ 41.57                               | 12.72 $\pm$ 12.05                  | 0.28         |
|                                              | Spirochaetes                             | 0.12 $\pm$ 0.20                                 | 0.45 $\pm$ 0.93                    | 0.80         |
|                                              | Tenericutes                              | 0.37 $\pm$ 0.61                                 | 0.18 $\pm$ 0.19                    | 0.90         |
| Class                                        | Actinobacteria                           | 1.95 $\pm$ 1.87                                 | 6.72 $\pm$ 3.46                    | 0.11         |
|                                              | Alphaproteobacteria                      | 4.12 $\pm$ 8.23                                 | 0.06 $\pm$ 0.11                    | 0.53         |
|                                              | Bacilli                                  | 17.65 $\pm$ 15.45                               | 42.11 $\pm$ 15.10                  | 0.06         |
|                                              | Bacteroidia                              | 11.75 $\pm$ 16.89                               | 24.16 $\pm$ 10.57                  | 0.19         |
|                                              | Campylobacteria                          | 0.54 $\pm$ 0.43                                 | 1.08 $\pm$ 0.80                    | 0.55         |
|                                              | Clostridia                               | 3.88 $\pm$ 5.24                                 | 3.52 $\pm$ 3.18                    | 0.90         |
|                                              | Coriobacteriia                           | 0.11 $\pm$ 0.19                                 | 0.51 $\pm$ 0.48                    | 0.11         |
|                                              | Fusobacteriia                            | 4.57 $\pm$ 3.17                                 | 8.14 $\pm$ 5.27                    | 0.55         |
|                                              | Gammaproteobacteria                      | 54.72 $\pm$ 39.86                               | 12.66 $\pm$ 12.09                  | 0.28         |
|                                              | Mollicutes                               | 0.37 $\pm$ 0.61                                 | 0.18 $\pm$ 0.19                    | 0.90         |
|                                              | Negativicutes                            | 0.14 $\pm$ 0.19                                 | 0.36 $\pm$ 0.16                    | 0.19         |
|                                              | Spirochaetia                             | 0.12 $\pm$ 0.20                                 | 0.45 $\pm$ 0.93                    | 0.80         |
| Order                                        | Actinomycetales                          | 0.49 $\pm$ 0.62                                 | 3.38 $\pm$ 2.10                    | <b>*0.03</b> |
|                                              | Bacillales                               | 1.03 $\pm$ 0.93                                 | 3.05 $\pm$ 2.24                    | 0.11         |
|                                              | Bacteroidales                            | 11.46 $\pm$ 16.81                               | 20.07 $\pm$ 11.74                  | 0.55         |
|                                              | Betaproteobacteriales                    | 43.60 $\pm$ 42.64                               | 7.99 $\pm$ 7.75                    | 0.28         |
|                                              | Campylobacteriales                       | 0.54 $\pm$ 0.43                                 | 1.08 $\pm$ 0.80                    | 0.55         |
|                                              | Cardiobacteriales                        | 0.004 $\pm$ 0.003                               | 0.11 $\pm$ 0.14                    | <b>*0.01</b> |
|                                              | Caulobacteriales                         | 3.67 $\pm$ 7.34                                 | 0.02 $\pm$ 0.03                    | 0.89         |
|                                              | Clostridiales                            | 3.88 $\pm$ 5.24                                 | 3.52 $\pm$ 3.18                    | 0.90         |
|                                              | Coriobacteriales                         | 0.11 $\pm$ 0.19                                 | 0.51 $\pm$ 0.48                    | 0.11         |
|                                              | Corynebacteriales                        | 0.04 $\pm$ 0.06                                 | 0.58 $\pm$ 0.46                    | <b>*0.03</b> |
|                                              | Flavobacteriales                         | 0.24 $\pm$ 0.17                                 | 4.07 $\pm$ 3.92                    | <b>*0.01</b> |
|                                              | Fusobacteriales                          | 4.57 $\pm$ 3.17                                 | 8.14 $\pm$ 5.27                    | 0.55         |
|                                              | Lactobacillales                          | 16.62 $\pm$ 14.59                               | 39.05 $\pm$ 14.09                  | 0.06         |
|                                              | Micrococcales                            | 1.40 $\pm$ 1.20                                 | 2.74 $\pm$ 1.74                    | 0.28         |

|        |                               |               |                |              |
|--------|-------------------------------|---------------|----------------|--------------|
|        | Mycoplasmatales               | 0.27 ± 0.42   | 0.18 ± 0.19    | 0.90         |
|        | Pasteurellales                | 0.91 ± 1.37   | 4.55 ± 4.29    | 0.06         |
|        | Pseudomonadales               | 10.21 ± 20.39 | 0.01 ± 0.008   | 0.90         |
|        | Rhizobiales                   | 0.44 ± 0.89   | 0 ± 0          | 0.37         |
|        | Selenomonadales               | 0.14 ± 0.19   | 0.36 ± 0.16    | 0.19         |
|        | Spirochaetales                | 0.12 ± 0.20   | 0.45 ± 0.93    | 0.80         |
| Family | Acholeplasmataceae            | 0.10 ± 0.19   | 0 ± 0          | 0.37         |
|        | Actinomycetaceae              | 0.49 ± 0.62   | 3.38 ± 2.10    | <b>*0.03</b> |
|        | Aerococcaceae                 | 0.02 ± 0.04   | 1.15 ± 1.83    | 0.20         |
|        | Atopobiaceae                  | 0.11 ± 0.19   | 0.48 ± 0.46    | 0.11         |
|        | Burkholderiaceae              | 0.03 ± 0.06   | 1.35 ± 2.77    | 0.11         |
|        | Campylobacteraceae            | 0.54 ± 0.43   | 1.08 ± 0.80    | 0.55         |
|        | Cardiobacteriaceae            | 0.004 ± 0.003 | 0.11 ± 0.14    | <b>*0.01</b> |
|        | Caulobacteraceae              | 3.67 ± 7.34   | 0.02 ± 0.03    | 0.89         |
|        | Clostridiales vadinBB60 group | 0.17 ± 0.33   | 0.01 ± 0.02    | 0.89         |
|        | Corynebacteriaceae            | 0.04 ± 0.06   | 0.57 ± 0.47    | <b>*0.03</b> |
|        | Family XI                     | 1.39 ± 1.13   | 3.44 ± 2.24    | 0.19         |
|        | Family XIII                   | 0.76 ± 1.31   | 0.39 ± 0.43    | 0.73         |
|        | Flavobacteriaceae             | 0.22 ± 0.15   | 3.86 ± 3.66    | <b>*0.01</b> |
|        | Fusobacteriaceae              | 4.19 ± 2.92   | 4.89 ± 3.89    | 0.99         |
|        | Lachnospiraceae               | 0.99 ± 1.17   | 1.45 ± 1.62    | 0.41         |
|        | Leptotrichiaceae              | 0.38 ± 0.42   | 3.25 ± 2.85    | <b>*0.01</b> |
|        | Micrococcaceae                | 1.39 ± 1.20   | 2.74 ± 1.74    | 0.28         |
|        | Moraxellaceae                 | 10.20 ± 20.39 | 0.0006 ± 0.001 | 0.86         |
|        | Multi-affiliation             | 0.73 ± 0.52   | 3.74 ± 1.70    | <b>*0.01</b> |
|        | Mycoplasmataceae              | 0.27 ± 0.42   | 0.18 ± 0.19    | 0.91         |
|        | Neisseriaceae                 | 43.57 ± 42.67 | 6.63 ± 5.27    | 0.19         |
|        | Paludibacteraceae             | 0.19 ± 0.23   | 0.11 ± 0.11    | 0.90         |
|        | Pasteurellaceae               | 0.91 ± 1.37   | 4.55 ± 4.30    | 0.06         |
|        | Peptostreptococcaceae         | 1.37 ± 1.99   | 1.02 ± 1.17    | 0.99         |
|        | Porphyromonadaceae            | 5.13 ± 9.33   | 5.91 ± 4.35    | 0.28         |
|        | Prevotellaceae                | 5.09 ± 5.81   | 12.93 ± 9.87   | 0.28         |
|        | Rhizobiaceae                  | 0.44 ± 0.89   | 0 ± 0          | 0.37         |
|        | Rikenellaceae                 | 0.46 ± 0.88   | 0.08 ± 0.11    | 0.90         |
|        | Ruminococcaceae               | 0.18 ± 0.31   | 0.22 ± 0.21    | 0.90         |
|        | Spirochaetaceae               | 0.12 ± 0.20   | 0.45 ± 0.93    | 0.80         |
|        | Streptococcaceae              | 15.86 ± 14.21 | 34.12 ± 14.29  | 0.11         |
|        | Tannerellaceae                | 0.18 ± 0.20   | 0.96 ± 1.40    | 0.35         |
|        | Unknown                       | 0.19 ± 0.21   | 0.14 ± 0.12    | 0.99         |
|        | Veillonellaceae               | 0.14 ± 0.19   | 0.36 ± 0.16    | 0.19         |
|        | Weeksellaceae                 | 0.02 ± 0.01   | 0.21 ± 0.37    | 0.14         |
| Genus  | <i>Abiotrophia</i>            | 0.02 ± 0.04   | 1.15 ± 1.83    | 0.20         |
|        | <i>Acinetobacter</i>          | 10.20 ± 20.39 | 0 ± 0          | 0.37         |
|        | <i>Actinomyces</i>            | 0.49 ± 0.62   | 3.38 ± 2.10    | <b>*0.03</b> |
|        | <i>Aggregatibacter</i>        | 0.03 ± 0.05   | 1.29 ± 2.13    | 0.10         |



|  |                                     |               |               |              |
|--|-------------------------------------|---------------|---------------|--------------|
|  | <i>Alloprevotella</i>               | 1.17 ± 1.84   | 0.48 ± 0.41   | 0.90         |
|  | <i>Atopobium</i>                    | 0.11 ± 0.19   | 0.47 ± 0.46   | 0.11         |
|  | <i>Bergeyella</i>                   | 0.02 ± 0.01   | 0.21 ± 0.34   | 0.14         |
|  | <i>Brevundimonas</i>                | 3.67 ± 7.34   | 0 ± 0         | 0.37         |
|  | <i>Campylobacter</i>                | 0.54 ± 0.43   | 1.08 ± 0.80   | 0.55         |
|  | <i>Capnocytophaga</i>               | 0.22 ± 0.15   | 3.86 ± 3.66   | <b>*0.01</b> |
|  | <i>Cardiobacterium</i>              | 0.004 ± 0.003 | 0.11 ± 0.14   | <b>*0.01</b> |
|  | <i>Catonella</i>                    | 0.31 ± 0.27   | 0.13 ± 0.10   | 0.32         |
|  | <i>Corynebacterium</i>              | 0.04 ± 0.06   | 0.57 ± 0.47   | <b>*0.03</b> |
|  | <i>Dialister</i>                    | 0.14 ± 0.19   | 0.33 ± 0.15   | 0.19         |
|  | <i>Eikenella</i>                    | 0.03 ± 0.04   | 0.11 ± 0.13   | 0.38         |
|  | <i>F0058</i>                        | 0.19 ± 0.23   | 0.11 ± 0.11   | 0.90         |
|  | <i>Filifactor</i>                   | 1.21 ± 1.94   | 0.99 ± 1.18   | 0.73         |
|  | <i>Fusobacterium</i>                | 4.19 ± 2.92   | 4.89 ± 3.89   | 0.99         |
|  | <i>Gemella</i>                      | 1.03 ± 0.93   | 3.05 ± 2.24   | 0.11         |
|  | <i>Haemophilus</i>                  | 0.87 ± 1.31   | 3.25 ± 2.31   | 0.11         |
|  | <i>Kingella</i>                     | 0.05 ± 0.04   | 0.77 ± 1.37   | 0.21         |
|  | <i>Lachnoanaerobaculum</i>          | 0.18 ± 0.29   | 0.19 ± 0.14   | 0.80         |
|  | <i>Lautropia</i>                    | 0.03 ± 0.06   | 1.27 ± 2.62   | 0.20         |
|  | <i>Leptotrichia</i>                 | 0.26 ± 0.35   | 3.25 ± 2.85   | <b>*0.01</b> |
|  | <i>Moryella</i>                     | 0.02 ± 0.03   | 0.14 ± 0.24   | 0.53         |
|  | <i>Multi-affiliation</i>            | 0.73 ± 0.52   | 3.74 ± 1.70   | <b>*0.01</b> |
|  | <i>Mycoplasma</i>                   | 0.27 ± 0.42   | 0.18 ± 0.19   | 0.90         |
|  | <i>Neisseria</i>                    | 43.50 ± 42.70 | 5.75 ± 5.03   | 0.19         |
|  | <i>Oribacterium</i>                 | 0.17 ± 0.30   | 0.41 ± 0.34   | 0.46         |
|  | <i>Parvimonas</i>                   | 0.37 ± 0.31   | 0.40 ± 0.33   | 0.90         |
|  | <i>Peptostreptococcus</i>           | 0.16 ± 0.14   | 0.02 ± 0.02   | 0.21         |
|  | <i>Porphyromonas</i>                | 5.13 ± 9.33   | 5.91 ± 4.35   | 0.28         |
|  | <i>Prevotella</i>                   | 0.61 ± 0.53   | 2.07 ± 1.40   | 0.11         |
|  | <i>Prevotella 2</i>                 | 0.07 ± 0.10   | 0.19 ± 0.16   | 0.19         |
|  | <i>Prevotella 6</i>                 | 0.06 ± 0.09   | 0.70 ± 0.59   | 0.14         |
|  | <i>Prevotella 7</i>                 | 2.63 ± 4.30   | 9.47 ± 7.62   | 0.19         |
|  | <i>Rikenellaceae RC9 gut group</i>  | 0.46 ± 0.88   | 0.08 ± 0.11   | 0.90         |
|  | <i>Rothia</i>                       | 1.39 ± 1.20   | 2.74 ± 1.74   | 0.28         |
|  | <i>Ruminococcaceae UCG-014</i>      | 0.18 ± 0.31   | 0.22 ± 0.21   | 0.90         |
|  | <i>Stomatobaculum</i>               | 0.29 ± 0.54   | 0.56 ± 0.98   | 0.46         |
|  | <i>Streptococcus</i>                | 15.86 ± 14.21 | 34.12 ± 14.29 | 0.11         |
|  | <i>Tannerella</i>                   | 0.18 ± 0.20   | 0.96 ± 1.40   | 0.32         |
|  | <i>Treponema 2</i>                  | 0.12 ± 0.20   | 0.45 ± 0.93   | 0.80         |
|  | <i>Unknown</i>                      | 0.82 ± 1.00   | 0.26 ± 0.22   | 0.99         |
|  | <i>[Eubacterium] brachy group</i>   | 0.23 ± 0.45   | 0.10 ± 0.11   | 0.62         |
|  | <i>[Eubacterium] nodatum group</i>  | 0.10 ± 0.19   | 0.15 ± 0.16   | 0.53         |
|  | <i>[Eubacterium] saphenum group</i> | 0.25 ± 0.37   | 0.08 ± 0.16   | 0.68         |
